# Supplementary material for: Facile multifunctional IOL surface modification via poly(PEGMA-co-GMA) grafting for posterior capsular opacification inhibition
Source: Royal Society of Chemistry journal article supplement (doi:10.1039/d1ra00201e), 2021-01-01
Supplement: d1ra00201e1.pdf [file d1ra00201e1.pdf]

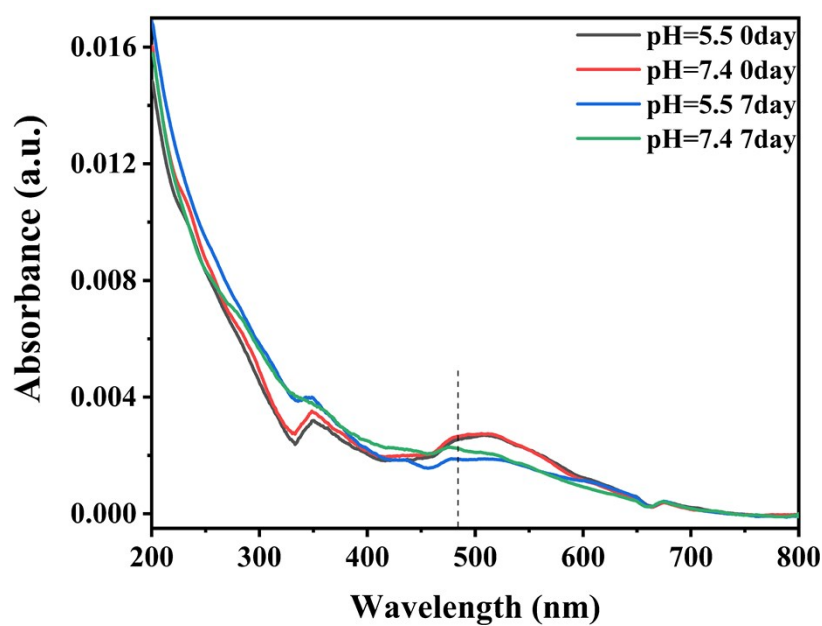

Figure S1: The UV-Vis spectra of the DOX@PPG modified materials, before and after drug release for 7 days in buffer solution with pH=7.4 and pH=5.5.

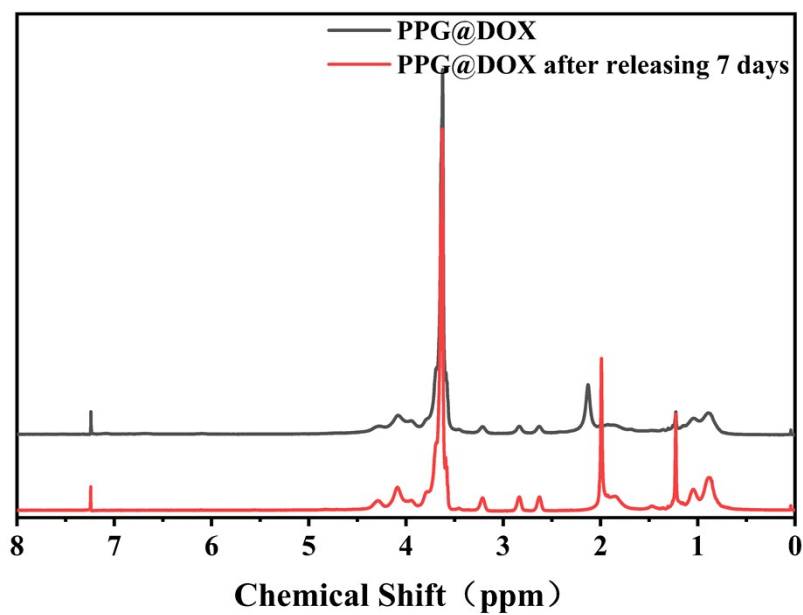

Figure S2. The <sup>1</sup>H-NMR spectra of the materials before and after released for one week.

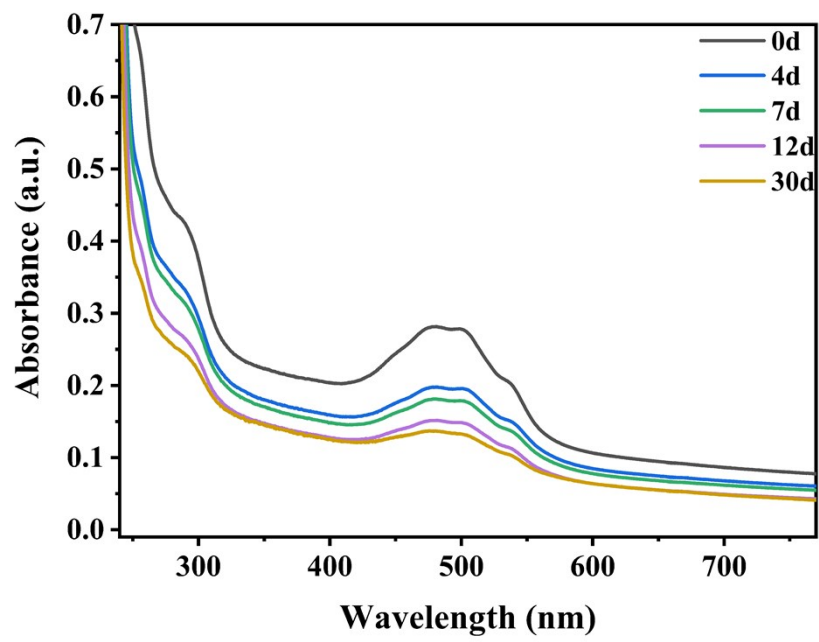

Figure S3. The UV-Vis spectra of the drug release process in buffer solution with pH=5.5.
